# Supplementary material for: Multidisciplinary Intensive Rehabilitation Program for People with Parkinson’s Disease: Gaps between the Clinic and Real-World Mobility
Source: MDPI journal article supplement (doi:10.3390/ijerph20053806), 2023-02-21
Supplement: s1 [file s1]

## Supplementary Material

### METHODS

#### Daily-living Axivity Features Overview

The measures derived from the Axivity recordings can broadly be divided into two families of metrics:

- 1) Gait quality (the quality of the walking pattern)
- 2) Activity and gait quantity (e.g., total daily-living physical activity, step counts)

The gait quality measures are determined in each walking bout across the recording of a relatively long duration (e.g., 60 seconds) and then the mean, median, 90%, 10% and standard deviation of each metric across all walking bouts of that size are determined.

Gait quality measures can be further subdivided into several subdomains:

- a) Pace: e.g., gait speed and step length
- b) Rhythm, e.g., step time, stride time, cadence, dominant frequency
- c) Symmetry, e.g., step regularity, step symmetry, harmonic ratio
- d) Complexity, e.g., entropy

The gait and activity measures are described in further detail below. See Galperin et al. [1] for additional description of the process:

<https://www.sciencedirect.com/science/article/pii/S1353802019300227?via%3Dihub>

#### Gait Quality Measures

##### Rhythm Measurements

###### Cadence [steps/min]

In daily life experiments (data recorded from Axivity device), we determine cadence from the frequency domain. We identified the dominant frequency of the signal, and calculate the inverse value of the dominant frequency, to determine the average step time.

###### Mean stride time [sec]

Time of average gait cycle (e.g., heel-strike to heel-strike of the same foot).

##### Symmetry Measurements

###### Step symmetry [nu]

Expresses the symmetry of the acceleration between left and right limbs.

###### Step regularity [nu]

Expresses the regularity of the acceleration between consecutive steps. Low step regularity indicated that there is a low regularity between steps or a systematic asymmetry between left and right leg.

##### Complexity Measurements

###### Entropy and Sample Entropy [nu]

These measure the complexity of the signal. Entropy is a measure that quantifies regularity in time series: the more predictable and less complex a series is, the lower the entropy value. For a given dimension  $m$ , parameter that defines the criterion of similarity  $r$  and the number of samples  $N$ , sample entropy is negative logarithmic of the probability that if two data points with length  $m$  have distance  $< r$  then data points with length  $m+1$  also have distance  $< r$ .

Sample entropy is defined as:

$$\text{SampEn}(m, r, N) = -\log \left( \frac{A(r)}{B(r)} \right) \quad [\text{nu}]$$

Where, A is the total number of template matches in m dimension; B is the total number of template matches in m+1 dimension. For example, it is known that aging reduces entropy and impaired systems exhibit lower entropy than healthy systems.

## **Gait Quantity Measures**

### **Step Count (day and night included)**

Sum of steps per calendar date (only during wear time) and averaged per week, calculated from walking bouts  $\geq 3$  seconds.

### **Number of Gait Bouts**

Gait bouts are grouped and counted depending on their duration ( $5s \leq x \leq 10s$ ,  $10s < x \leq 20s$ ,  $20s < x \leq 30s$ ,  $30s < x \leq 60s$ ,  $60s < x \leq 120s$ ,  $x > 120s$ ).

### **Signal Vector Magnitude (SVM) [mg]**

Signal vector magnitude of the measured acceleration signal from three axes calculated for each 15 seconds epoch. This reflects physical activity.

The steps of the SVM algorithm:

1. Calculate SVM signal as
$$SVM = \sqrt{vAcc.^2 + mAcc.^2 + apAcc.^2};$$
2. Filter the SVM signal fourth-order Butterworth band-pass filter between 0.5Hz and 20Hz.
3. The SVM signal is split into 15-sec windows (no overlap).
4. Per each day/night the mean and the sum of all windows are calculated.
5. The summed value is then normalized by the wear time in hours (per each day/night) to avoid bias in days/nights with low wear time.
6. The median value of all days/nights is extracted for both the mean and sum values.

### **Gait Detection**

Gait events were estimated from a continuous wavelet transform (CWT, using the cwt MATLAB function) of the vertical acceleration signal which was first filtered, using 4th order Butterworth filter between 0.15 and 4 Hz. The wavelet transform decomposes signals over scaled and translated versions of the mother wavelet function, in our case Morlet wavelet. After the wavelet transform, all coefficients were summed and the envelope was calculated. A threshold on the summed coefficient signal was then applied to discriminate between gait events to non-gait events.

## RESULTS

**Table S1a: Comparing daily-living gait quantity measures pre intervention vs. immediate post intervention within 1 week**

|                                      | Pre intervention             | Post intervention         | P-value |
|--------------------------------------|------------------------------|---------------------------|---------|
| <b>Gait Quantity</b>                 |                              |                           |         |
| Steps per day (average)              | 4496.50<br>[2513.00-7501.25] | 4502.5<br>[2456.7-7384.0] | 0.429   |
| Mean SVM (g)                         | 1.08 (±0.38)                 | 1.13 (±0.41)              | 0.143   |
| Sum SVM (g)                          | 92430.83 (±31006.95)         | 91220.7 (±32549.8)        | 0.651   |
| Percent Active (%)                   | 8.08 (±2.20)                 | 8.08 (±2.68)              | 0.992   |
| Number of 5-10 seconds bouts/day     | 84.13 (±45.69)               | 87.55 (±54.40)            | 0.419   |
| Number of 60-120 seconds bouts/day   | 2.5 [1.00-5.25]              | 2.75 [1.00-4.00]          | 0.625   |
| Number of long bouts/ day (>120 sec) | 2.00 [0.00-3.13]             | 1.00 [0.00-3.50]          | 0.277   |

**Gait Quantity:** Data are presented based on walking bouts equal to or longer than 6 seconds. Values are presented as mean+/-SD for continuous variables with normal distribution and median [IQR] for variables with abnormal distribution. Normal distribution is based on Kolmogorov-Smirnov test. P-Value is based on dependent t-test/Wilcoxon, P-Value<0.05

**Table S1b: Comparing daily-living gait quality measures pre intervention vs. immediate post intervention within 1 week**

|                                    |                          | Pre intervention      | Post intervention     | P-value |
|------------------------------------|--------------------------|-----------------------|-----------------------|---------|
| Gait Quality                       |                          |                       |                       |         |
| <b>Rhythm</b>                      | Cadence (step/min)       | 102.85 [97.68-109.48] | 102.02 [97.30-110.43] | 0.413   |
|                                    | Stride Time (sec)        | 1.16 (±0.11)          | 1.17 (±0.13)          | 0.359   |
|                                    | Gait Speed (cm/sec)      | 89.00 (±18.49)        | 87.70 (±19.16)        | 0.389   |
| <b>Magnitude</b>                   | frqV (Hz)                | 1.82 (±0.21)          | 1.82 (±0.24)          | 0.783   |
| <b>Consistency<br/>/regularity</b> | Step Regularity V (nu)   | 0.49 (±0.16)          | 0.48 (±0.16)          | 0.269   |
|                                    | Stride Regularity V (nu) | 0.44 (±0.14)          | 0.42 (±0.15)          | 0.210   |
|                                    | Step Asymmetry V (nu)    | 0.20 (±0.97)          | 0.21 (±0.11)          | 0.618   |
|                                    | Step Length (cm)         | 51.77 (±9.17)         | 51.26 (±9.20)         | 0.402   |
|                                    | Sample Entropy V (nu)    | 0.19 [0.14-0.22]      | 0.18 [0.14-0.24]      | 0.627   |
|                                    | Sample Entropy ML (nu)   | 0.21 (±0.80)          | 0.20 (±0.76)          | 0.386   |
|                                    | Sample Entropy AP (nu)   | 0.17 [0.13-0.21]      | 0.16 [0.12-0.20]      | 0.243   |

**Gait Quality:** Data are presented based on walking bouts equal or larger than 30 seconds, after removing irregular bouts. Values are presented as mean+/-SD for continuous variables with normal distribution and median [IQR] for variables with abnormal distribution. Normal distribution is based on Kolmogorov-Smirnov test. P-Value is based on dependent t-test/Wilcoxon, P-Value<0.05
